# Supplementary material
Source: PubMed Central journal article supplement (PMC1785399)
Supplement: plntcell_tpc.106.046730_1.pdf [file plntcell_tpc.106.046730_1.pdf]

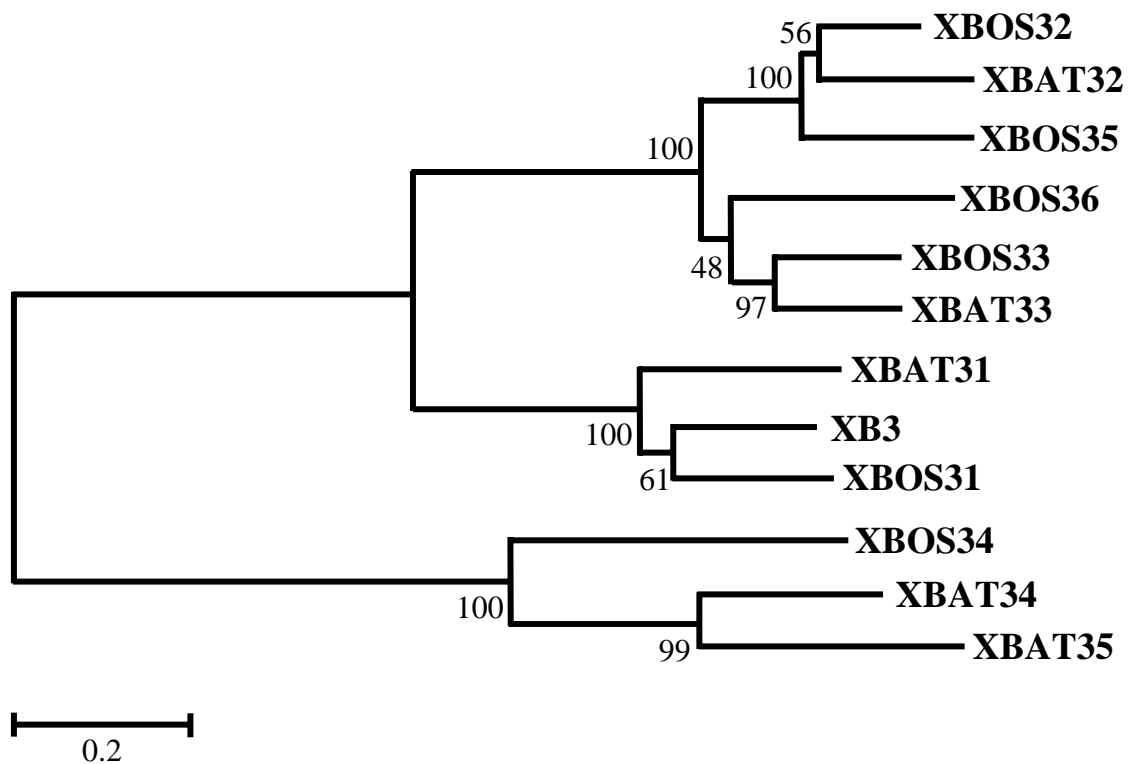

**Supplemental figure 1.** Phylogenetic tree based on the predicted amino acid sequences of XB3 and XB3-related proteins from rice (XBOS) and Arabidopsis (XBAT).
