# Supplementary material
Source: PubMed Central journal article supplement (PMC1785399)
Supplement: plntcell_tpc.106.046730_2.pdf [file plntcell_tpc.106.046730_2.pdf]

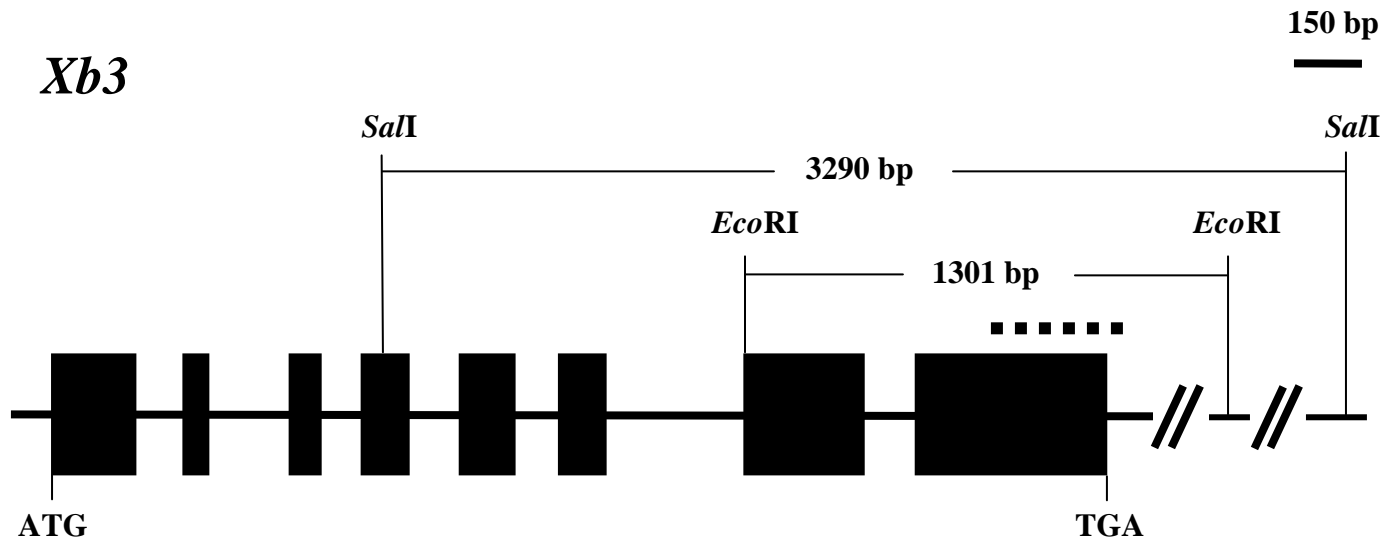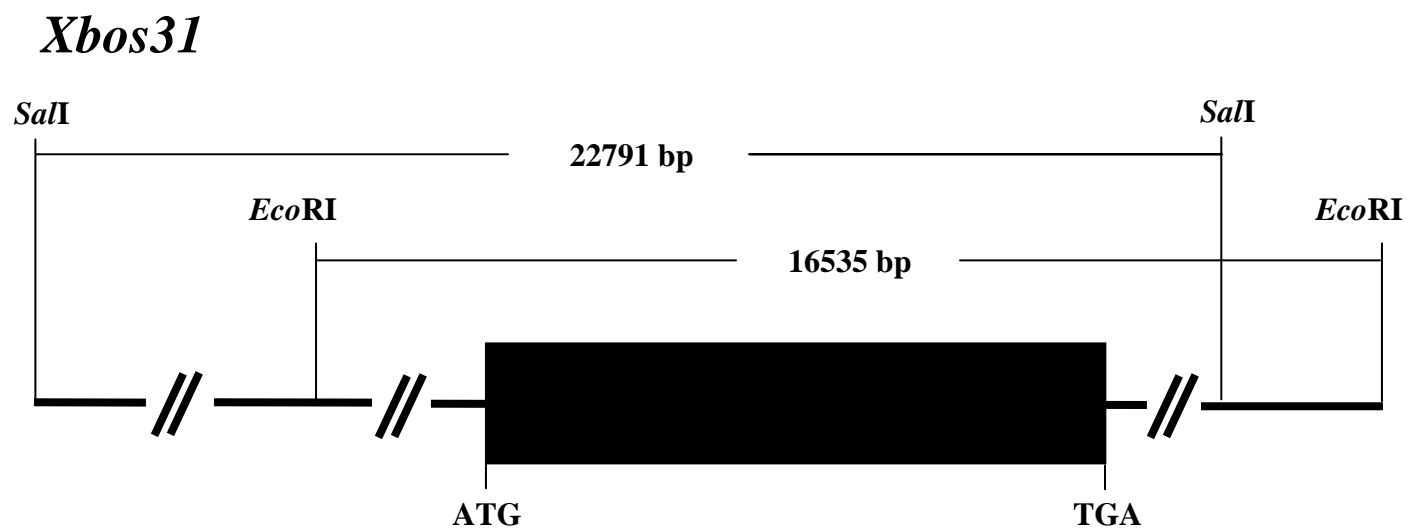

**Supplemental figure 2.** Schematic representation of the *Xb3* and *Xbos31* genomic gene structures (derived from the Genebank accession numbers AC079356 and AP003627, respectively). Closed boxes represent exons and lines between boxes represent introns. Start codon ATG and stop codon TGA are indicated. The dashed line denotes the *Xb3* probe used for DNA blot analyses and for RNA interference (RNAi). Restriction sites for *SalI* and *EcoRI* and the distance of the minimal *SalI*- or *EcoRI*-cutting fragments flanking the *Xb3* probe are also shown. The bar indicates scale. “//” denotes gaps.
