# Supplementary material
Source: PubMed Central journal article supplement (PMC1785399)
Supplement: plntcell_tpc.106.046730_4.pdf [file plntcell_tpc.106.046730_4.pdf]

**Supplemental table 1.** Comparisons of amino acid sequences between the XB3-related proteins from rice and Arabidopsis

---

|        | XB3    | XBOS31 | XBOS32 | XBOS33 | XBOS34 | XBOS35 | XBOS36 | XBAT31 | XBAT32 | XBAT33 | XBAT34 | XBAT35 |
|--------|--------|--------|--------|--------|--------|--------|--------|--------|--------|--------|--------|--------|
| XB3    | ---    |        |        |        |        |        |        |        |        |        |        |        |
| XBOS31 | 69, 76 | ---    |        |        |        |        |        |        |        |        |        |        |
| XBOS32 | 33, 41 | 32, 38 | ---    |        |        |        |        |        |        |        |        |        |
| XBOS33 | 34, 42 | 36, 43 | 55, 59 | ---    |        |        |        |        |        |        |        |        |
| XBOS34 | 24, 28 | 25, 34 | 24, 43 | 18, 35 | ---    |        |        |        |        |        |        |        |
| XBOS35 | 36, 42 | 32, 39 | 62, 68 | 49, 54 | 20, 31 | ---    |        |        |        |        |        |        |
| XBOS36 | 35, 42 | 33, 39 | 52, 57 | 54, 59 | 22, 25 | 47, 55 | ---    |        |        |        |        |        |
| XBAT31 | 67, 73 | 60, 68 | 33, 39 | 32, 40 | 30, 30 | 35, 41 | 33, 39 | ---    |        |        |        |        |
| XBAT32 | 33, 38 | 30, 35 | 64, 69 | 50, 55 | 17, 17 | 57, 63 | 47, 54 | 30, 35 | ---    |        |        |        |
| XBAT33 | 34, 42 | 32, 38 | 54, 61 | 65, 72 | 22, 27 | 50, 57 | 56, 62 | 32, 39 | 51, 58 | ---    |        |        |
| XBAT34 | 24, 31 | 26, 32 | 33, 33 | 24, 30 | 49, 57 | 23, 30 | 24, 31 | 27, 34 | 24, 30 | 23, 29 | ---    |        |
| XBAT35 | 23, 31 | 22, 30 | 15, 35 | 19, 30 | 59, 64 | 31, 38 | 21, 24 | 30, 50 | 23, 23 | 20, 30 | 68, 73 | ---    |

---

(Left: identity; right: similarity)
